# Supplementary material
Source: publisher figshare collection journal article supplement (https://tandf.figshare.com/ndownloader/files/13747043)
Supplement: Supplementary file 1 [file 13747043]

Supplementary Data

**A Molecular and computational approaches to understand resistance of New Delhi Metallo** β**- lactamase variants (NDM-1, NDM-4, NDM-5, NDM-6, NDM-7)-producing strains against carbapenems**

**Abid Ali1 , Divya Gupta1,3, Gaurava Srivastava2, Ashok sharma2, Asad U Khan1**

1Medical Microbiology and Molecular Biology Lab., Interdisciplinary Biotechnology Unit, Aligarh Muslim University, Aligarh – 202002.

2Biotechnology Division, CSIR-CIMAP , Lucknow-226015, India

3Department of Life sciences, Uttarakhand Technical University, Dehradun, Uttarakhand-248007, India

**Running title**: comparative analysis of NDM variants for their action

***Corresponding author:** Prof. Asad U. Khan, Medical Microbiology and Molecular Biology Lab., Interdisciplinary Biotechnology Unit, Aligarh Muslim University, Aligarh – 202002,UP, India. Ph.: 0091-9837021912, Fax: 0091-571-2721776

Email id: [asad.k@rediffmail.com](mailto:asad.k@rediffmail.com)


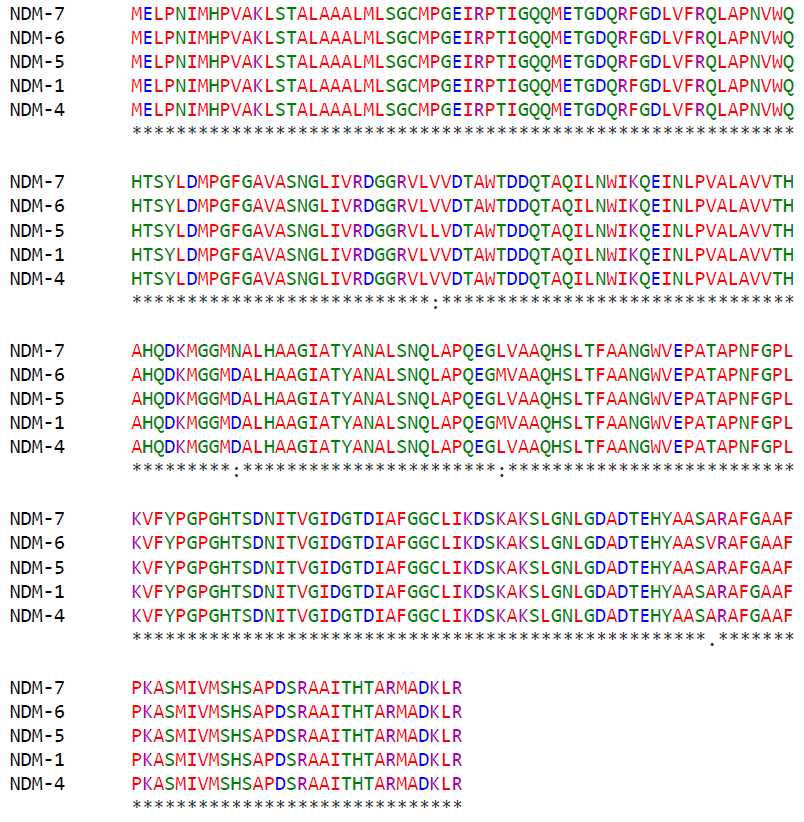
S1

Figure S1: Multiple sequence alignment of NDM variants


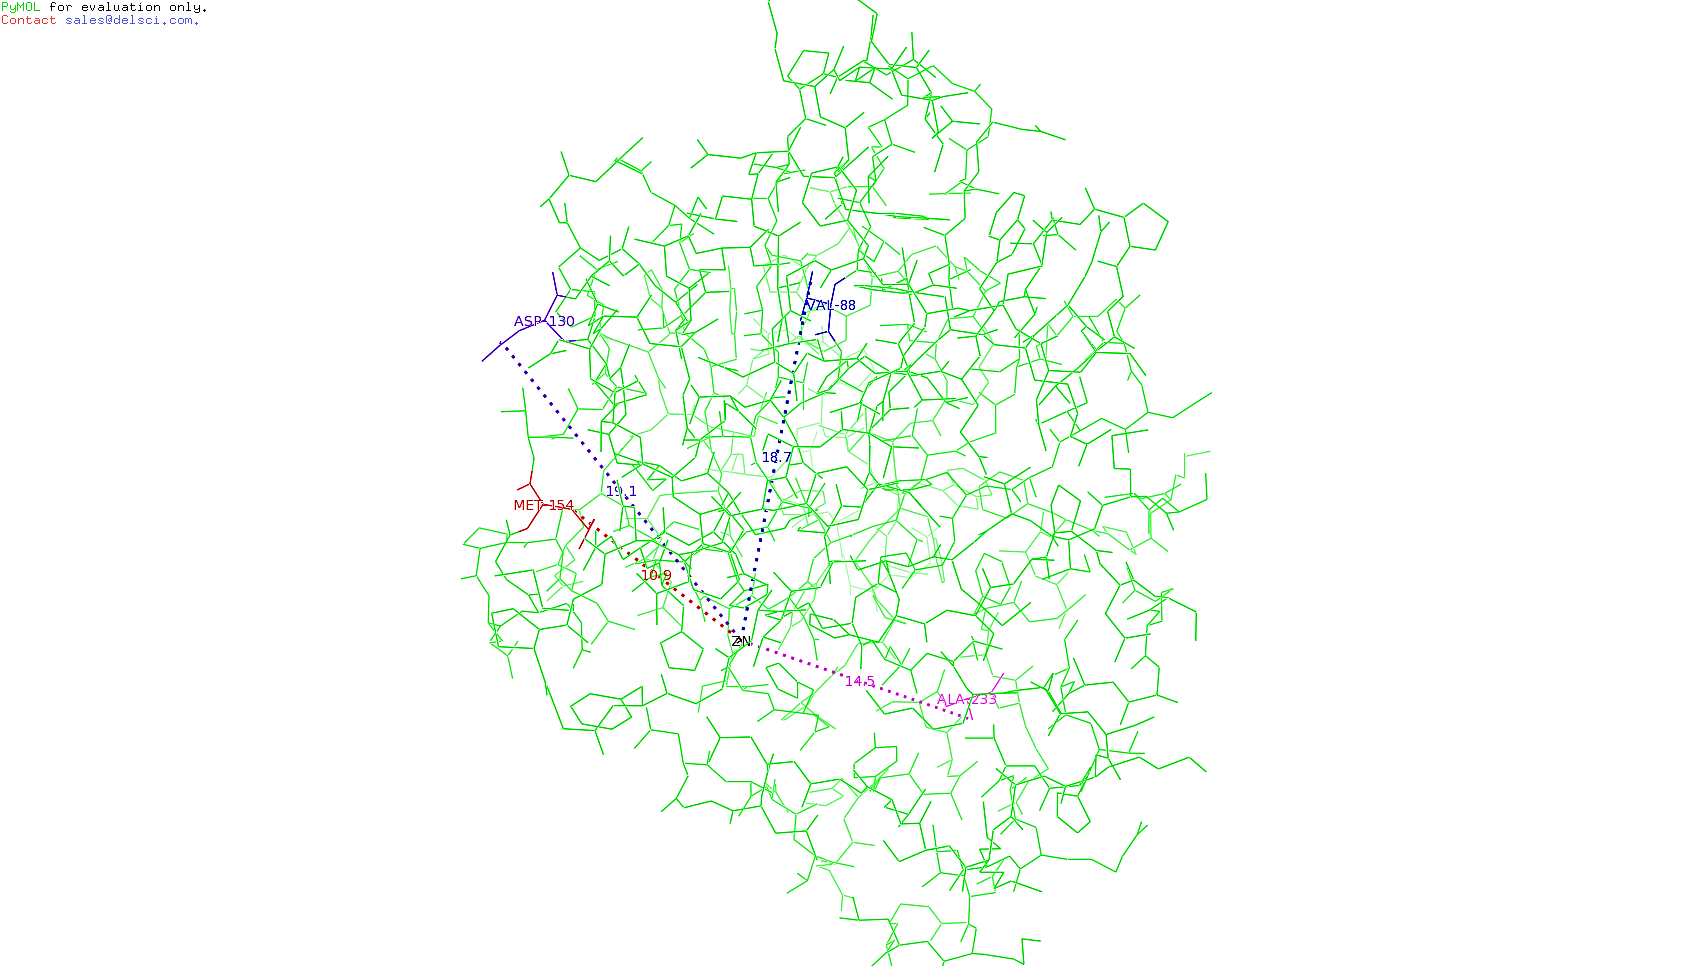
S2

Figure S2: Distance (in angstrom) between zinc ion and various mutants.
